# Supplementary material for: A metal-free perylene–porphyrin based covalent organic framework for electrocatalytic hydrogen evolution
Source: Royal Society of Chemistry journal article supplement (doi:10.1039/d4se00829d), 2024-01-01
Supplement: d4se00829d1.pdf [file d4se00829d1.pdf]

## Supporting Information

# A metal-free perylene-porphyrin based covalent organic framework for electrocatalytic hydrogen evolution

Siddhartha Samanta,<sup>a</sup> Sahina Khatun,<sup>a</sup> Ishita Mukherjee,<sup>a</sup> Sanhita Maity,<sup>b</sup> Matthew A. Addicoat,<sup>c</sup> Anirban Pradhan,<sup>a,\*</sup>

<sup>a</sup> Department of Chemistry, Birla Institute of Technology (BIT) – Mesra, Ranchi, Jharkhand, 835215, India, Email: [anirbanpradhan@bitmesra.ac.in](mailto:anirbanpradhan@bitmesra.ac.in)

<sup>b</sup> Department of Applied Sciences, Amity University, Jharkhand

<sup>c</sup> School of Science and Technology, Nottingham Trent University, Clifton Lane, Nottingham, NG11 8NS, UK.

| Section | Contents                                                                                                                                            | Page no |
|---------|-----------------------------------------------------------------------------------------------------------------------------------------------------|---------|
| S1      | Synthetic Scheme of 5,10,15,20-tetrakis (paraaminophenyl) 21H,23H-porphyrin(5) and 4,4',4'',4'''-(perylene-2,5,8,11-tetrayl) tetrabenzaldehyde (9). | S2      |
| S2      | <sup>1</sup> H NMR and <sup>13</sup> C NMR spectrum of the synthesized compounds.                                                                   | S3-S4   |
| S3      | Experimental Section                                                                                                                                | S4-S6   |
| S4      | A Comparison table for the metal free HER activity of PETA-PAM-COF with other different materials which are previously reported in literature       | S7-S8   |
| S5      | Theoretical Calculations                                                                                                                            | S9-S22  |
| S6      | References                                                                                                                                          | S23     |

## Section S1:

### 1. Synthetic Scheme of 5,10,15,20-tetrakis (paraaminophenyl) 21H,23H-porphyrin(5):

The synthesis of tetra-amine porphyrin (5) was done using previously reported procedure.<sup>14</sup>

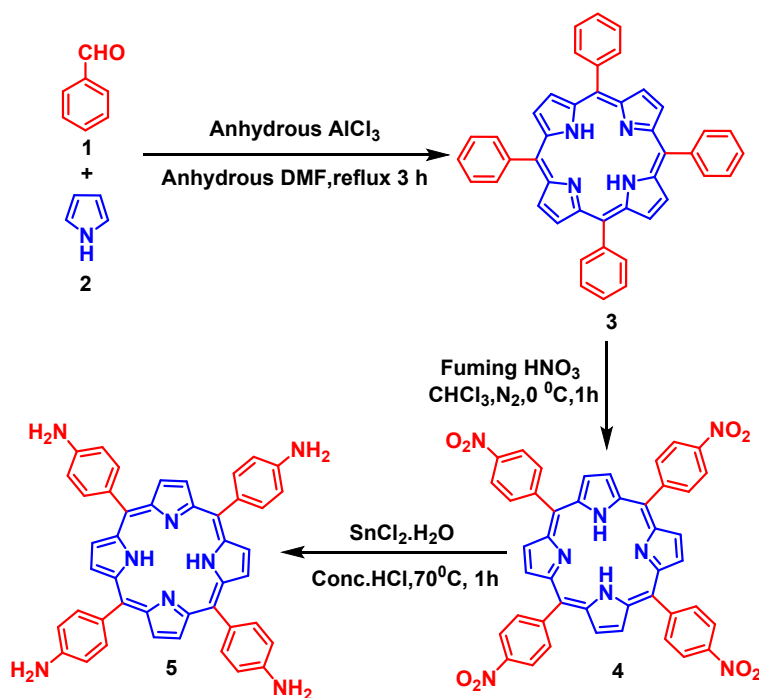

### 2. Synthetic Scheme of 4,4',4'',4'''-(perylene-2,5,8,11-tetrayl) tetrabenzaldehyde (9):

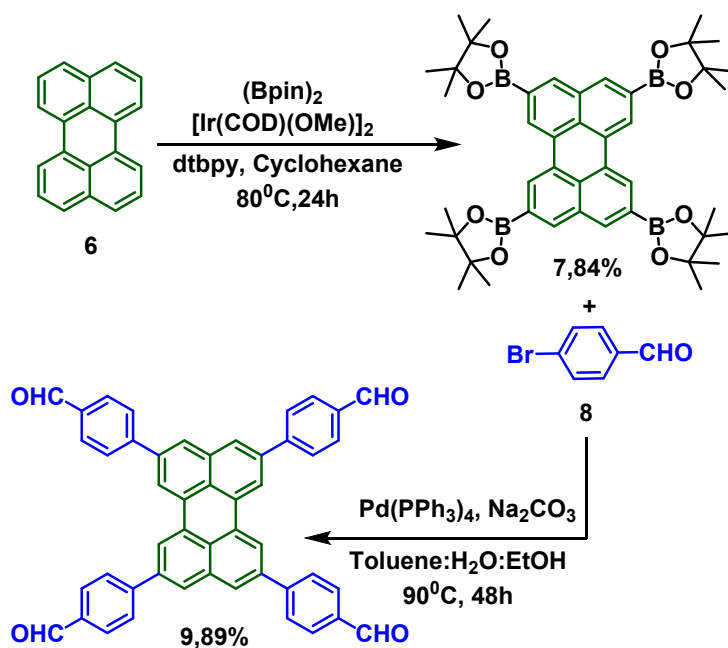

## Section S2:

$^1\text{H}$  NMR and  $^{13}\text{C}$  NMR spectrum of synthesized compounds:

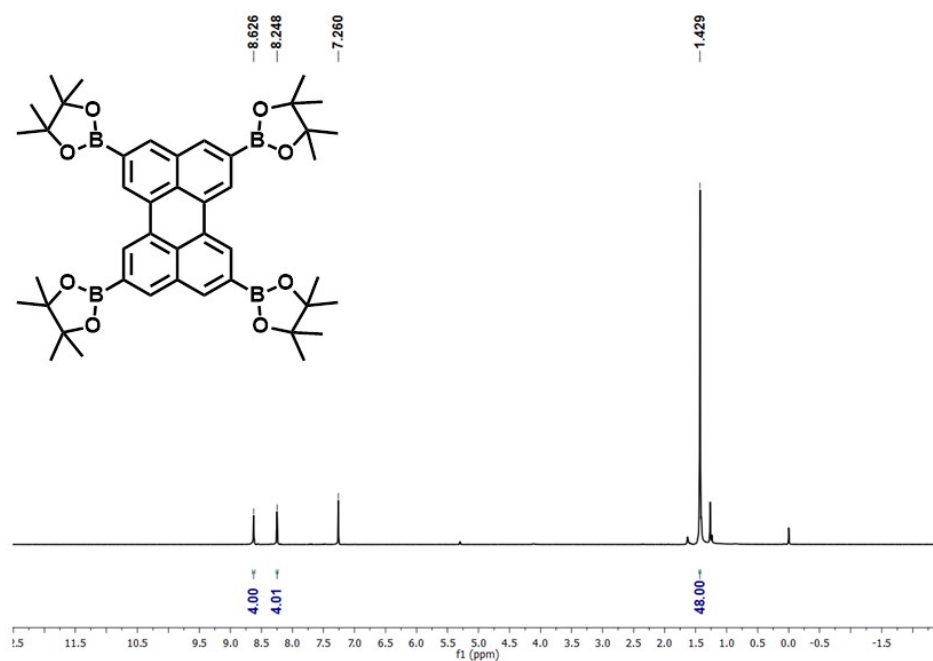

**Fig. S1.**  $^1\text{H}$ -NMR of compound 2,5,8,11-tetrakis(4,4,5,5-tetramethyl-1,3,2-dioxaborolan-2-yl)perylene (7).

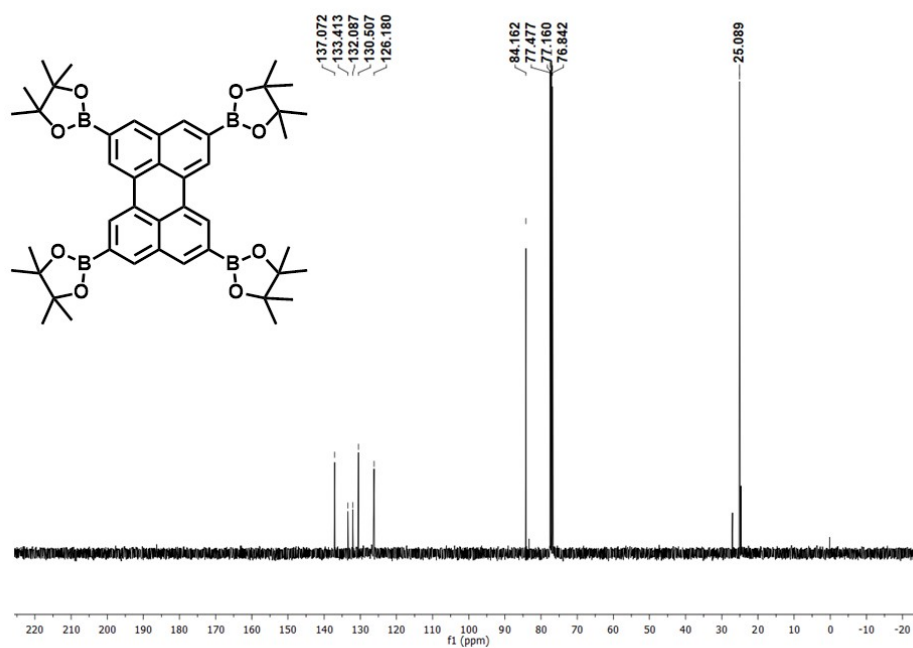

**Fig. S2.**  $^{13}\text{C}$ -NMR of compound 2,5,8,11-tetrakis(4,4,5,5-tetramethyl-1,3,2-dioxaborolan-2-yl)perylene (7).

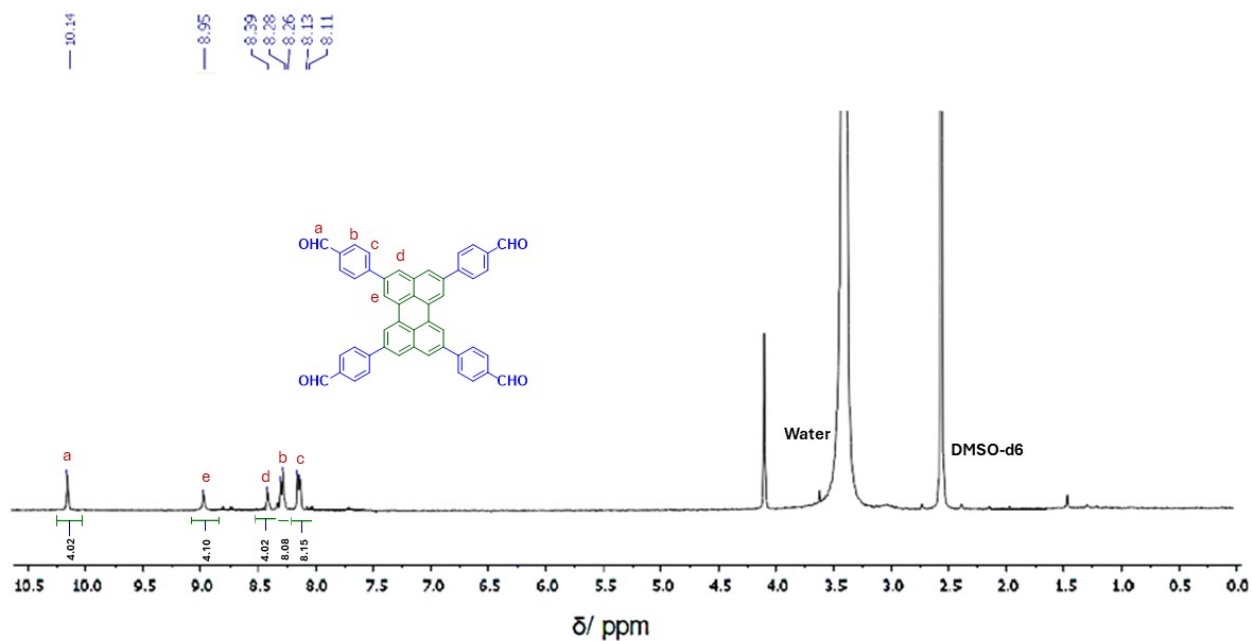

Fig. S3.  $^1\text{H-NMR}$  of compound 4,4',4'',4'''-(perylene-2,5,8,11-tetrayl) tetrabenzaldehyde (9):

### Section S3

#### Experimental Section:

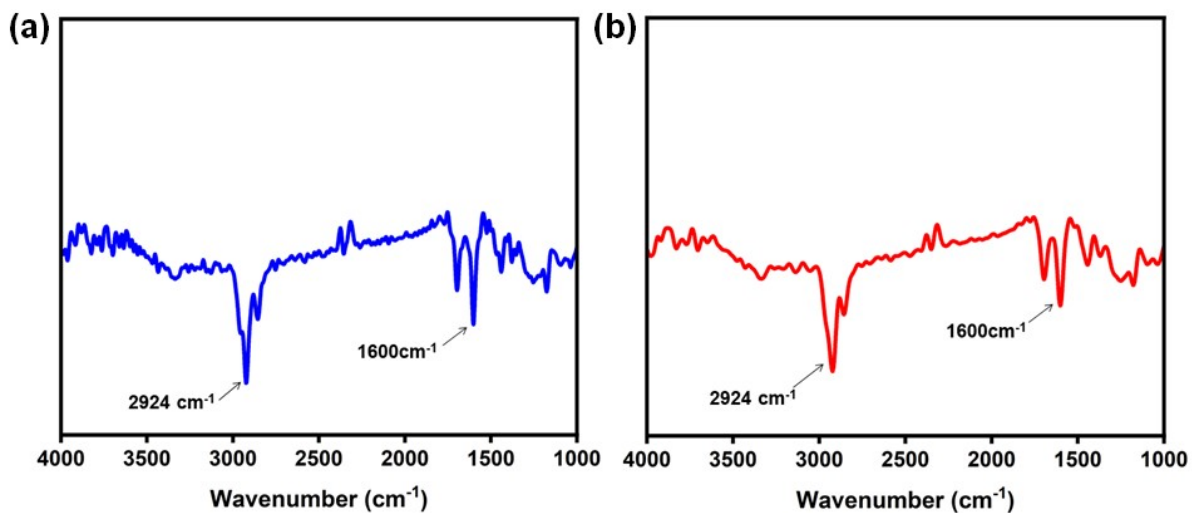

Fig. S4. FTIR Spectra of the PETA-PAM-COF after immersion in acidic (a) and basic medium (b).

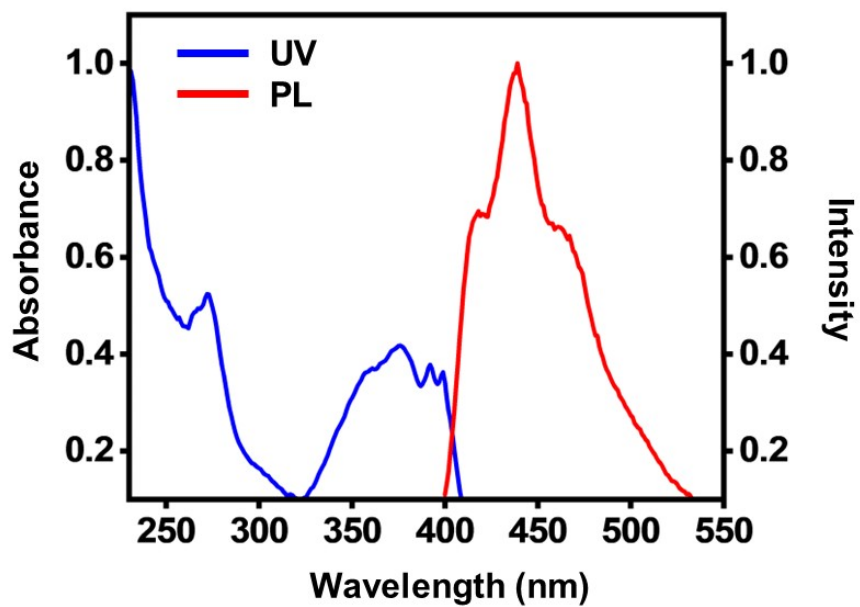

Fig. S5. Solid-state UV and photoluminescence spectra of PETA-PAM-COF.

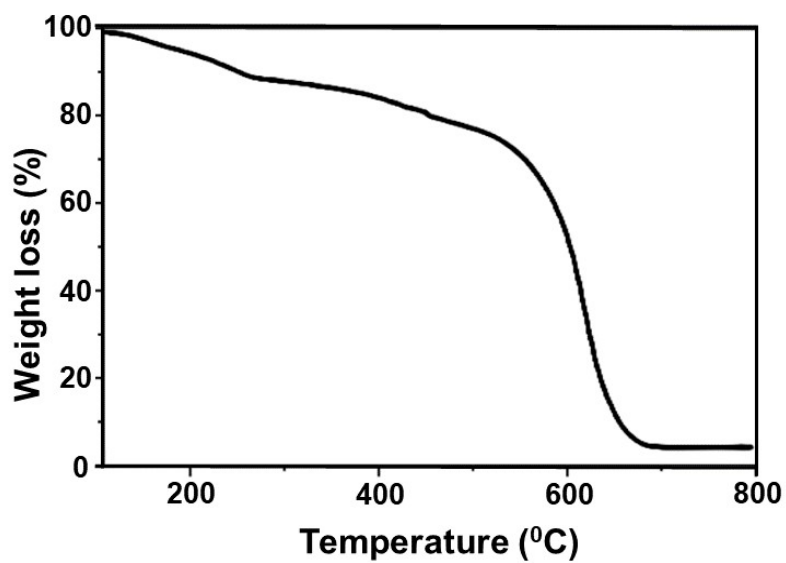

Fig. S6. Thermogravimetric Analysis (TGA) graph of PETA-PAM-COF.

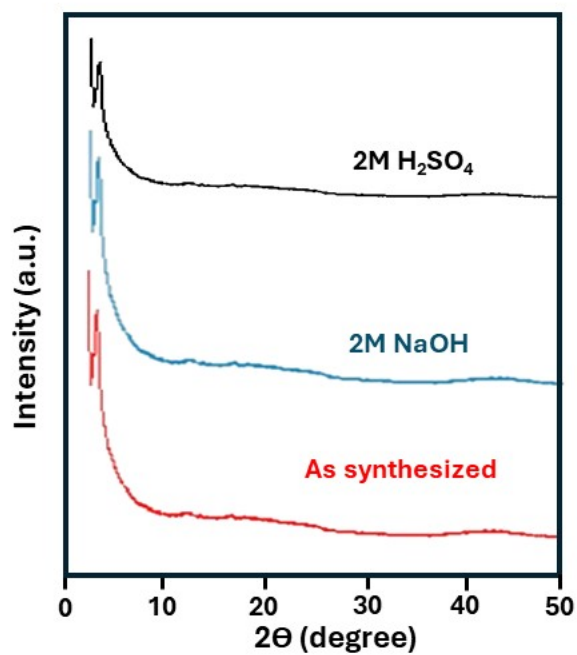

**Fig. S7.** XRD pattern of PETA-PAM-COF after treating in different conditions; 2M H<sub>2</sub>SO<sub>4</sub> and 2M NaOH.

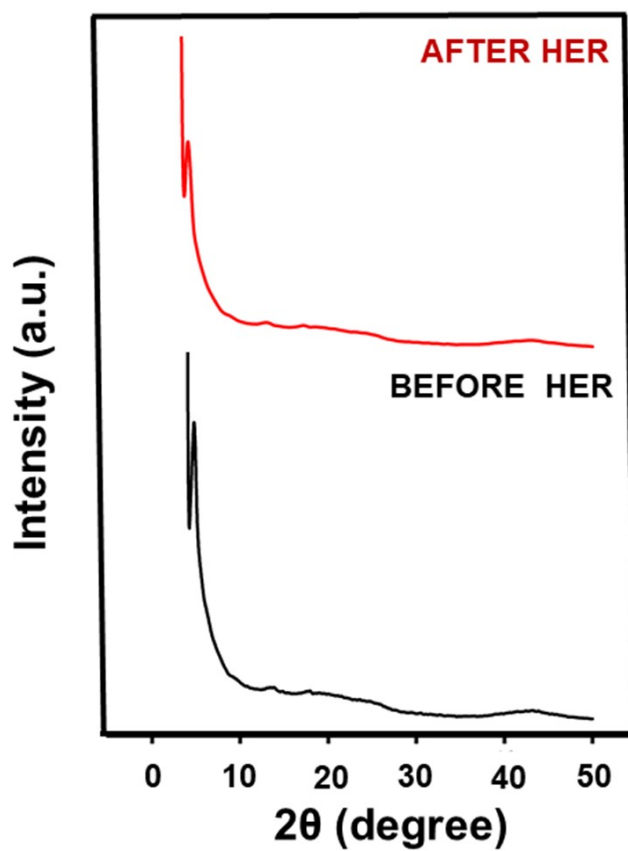

**Fig. S8.** XRD pattern of PETA-PAM-COF after and before HER was performed.

## Section S4

**Table S1:** A Comparison table for the metal free HER activity of **PETA-PAM-COF** with other different materials which are previously reported in literature:

| Material                               | Over potential @ 10 mAcm <sup>-2</sup> (mV) | Tafel slope (mV/decade) | Exchange current density (i <sub>0</sub> ) | Experiment condition                 | Reference |
|----------------------------------------|---------------------------------------------|-------------------------|--------------------------------------------|--------------------------------------|-----------|
| Pt electrode                           | 58                                          | 30                      | $2.7 \times 10^{-3} \text{ A cm}^{-2}$     | 0.5 M H <sub>2</sub> SO <sub>4</sub> | 1-3       |
| C3N4@NG                                | 240                                         | 51.5                    | $3.5 \times 10^{-7} \text{ A cm}^{-2}$     | 4 M AgCl/KCl                         | 4         |
| CoP-2ph-CMP-800                        | 360                                         | 121                     | -                                          | 1 M KOH                              | 5         |
| Cu-MOF                                 | 209                                         | 84                      | -                                          | 0.5 M H <sub>2</sub> SO <sub>4</sub> | 6         |
| N,P-graphene                           | 420                                         | 91                      | $2.4 \times 10^{-7} \text{ A cm}^{-2}$     | 0.5 M H <sub>2</sub> SO <sub>4</sub> | 7         |
| P-doped graphene                       | 553                                         | 133                     | $9 \times 10^{-3} \mu\text{F cm}^{-2}$     | 0.5 M H <sub>2</sub> SO <sub>4</sub> | 7         |
| N-doped graphene                       | 490                                         | 116                     | $7 \times 10^{-2} \mu\text{F cm}^{-2}$     | 0.5 M H <sub>2</sub> SO <sub>4</sub> | 7         |
| NS co-doped Nano-porous Graphene 5000C | 276                                         | 81                      | $6.5 \times 10^{-5} \text{ mA cm}^{-2}$    | 0.5 M H <sub>2</sub> SO <sub>4</sub> | 8         |
| C3N4/FTO                               | 100                                         | 120                     | -                                          | 0.1M KOH                             | 9         |
| p-MWCNTs-ao-cp                         | 220                                         | 71.3                    | $16 \times 10^{-3} \text{ mA cm}^{-2}$     | 0.5 M H <sub>2</sub> SO <sub>4</sub> | 10        |
| g-C3N4 nanoribbon-G                    | 207                                         | 54                      | $3.98 \times 10^{-3} \text{ mA cm}^{-2}$   | 0.5 M H <sub>2</sub> SO <sub>4</sub> | 11        |
| THTNi 2DSP                             | 333                                         | 80.5                    | $6 \times 10^{-4} \text{ mA cm}^{-2}$      | 0.5 M H <sub>2</sub> SO <sub>4</sub> | 12        |
| Cu-CMP850                              | 350                                         | 135                     | -                                          | 1 M KOH                              | 13        |
| TpPAM                                  | 250                                         | 106                     | $2.4 \times 10^{-4} \text{ A cm}^{-2}$     | 0.5 M H <sub>2</sub> SO <sub>4</sub> | 14        |
| Ru@COF                                 | 212                                         | 79                      | -                                          | 1.5 M H <sub>2</sub> SO <sub>4</sub> | 15        |

|                       |                             |       |                                           |                                      |                  |
|-----------------------|-----------------------------|-------|-------------------------------------------|--------------------------------------|------------------|
| SB-PORPy COF          | 380 @ 5 mA.cm <sup>-2</sup> | 116   | 5 mA cm <sup>-2</sup>                     | 0.5 M H <sub>2</sub> SO <sub>4</sub> | 16               |
| CoP nanosheets        | 100                         | 76    | 0.67 mA cm <sup>-2</sup>                  | 1.0 M KOH                            | 17               |
| MoCx                  | 142                         | 53    | 0.023 mA cm <sup>-2</sup>                 | 0.5 M H <sub>2</sub> SO <sub>4</sub> | 18               |
| Mo <sub>2</sub> C@NPC | 260                         | 126.4 | 1.9 × 10 <sup>-3</sup> A cm <sup>-2</sup> | 0.5 M H <sub>2</sub> SO <sub>4</sub> | 19               |
| NU-1000_Ni-S          | 238                         | 111   | -                                         | 0.5 M H <sub>2</sub> SO <sub>4</sub> | 20               |
| Co-(MOFs)             | 324                         | 33    | -                                         | 1 M KOH                              | 21               |
| C-Fe, Co-COF          | 260                         | 150   | 6.1 mA cm <sup>-2</sup>                   | 0.1 M KOH                            | 22               |
| Cu-CMP850             | 350                         | 135   | -                                         | 1.0 M KOH                            | 23               |
| TFPB-PAM              | 185                         | 68.5  | 4.9 × 10 <sup>-4</sup> A cm <sup>-2</sup> | 0.5 M H <sub>2</sub> SO <sub>4</sub> | 24               |
| NENU-500              | 237                         | 96    | 0.139 mA cm <sup>-2</sup>                 | 0.5 M H <sub>2</sub> SO <sub>4</sub> | 25               |
| PETA-PAM-COF          | 261                         | 122   | 3.7 × 10 <sup>-4</sup> A cm <sup>-2</sup> | 0.5 M H <sub>2</sub> SO <sub>4</sub> | <b>This work</b> |

## Section S5

### Computational Method:

The theoretical calculations from the powder X-ray diffraction (PXRD) pattern for the PETA-PAM-COF: The positions of atoms of the PETA-PAM-COF were optimized using the Self-Consistent-Charge Density-Functional Tight-Binding (SCC-DFTB) method as implemented in the DFTB+ version 19.1. All pair wise atomic interactions (C, H) were treated using the mio-0-1 parameter set 3 and dispersion was accounted for using UFF dispersion. It is known that the layer stacking is affected by the Coulomb repulsion between the partial atomic charges in adjacent layers. Hence, several simulated stacking possibilities were considered for the COF by shifting adjacent layers with respect to each other in different directions. Every one of the starting geometry was fully optimized without any constraints (P1 space group). The predicted AA stacking structure has the lowest energy, and is in good agreement with the experimental PXRD pattern.



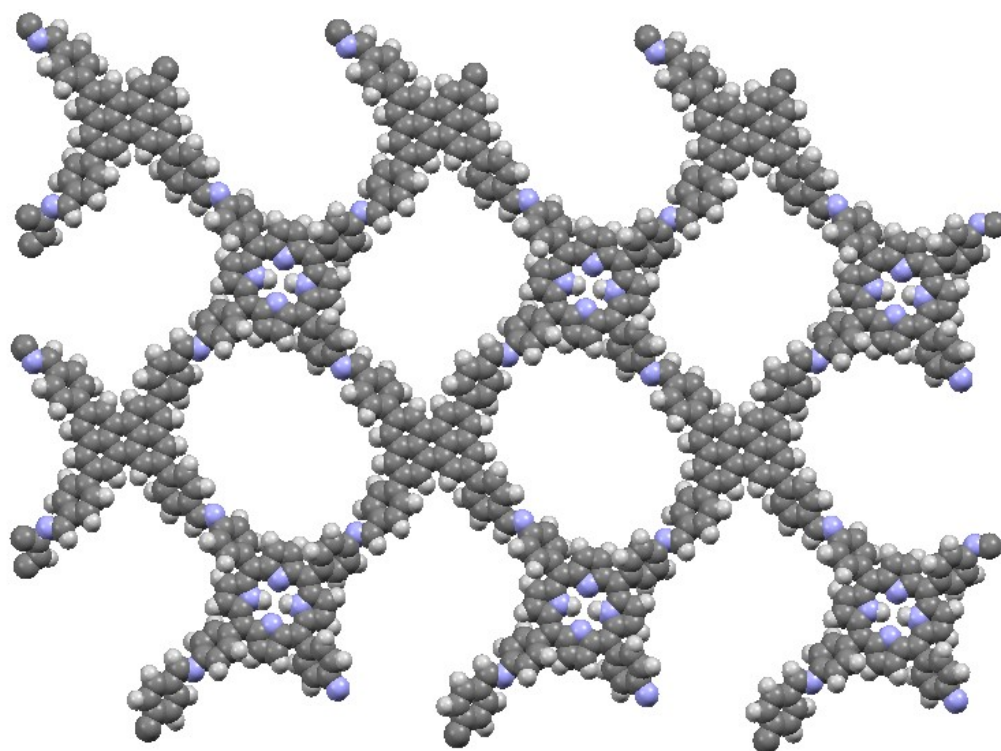

**Fig. S9.** Simulated AA stacking structure of **PETA-PAM-COF**.

**Table S2.** Energies, stabilization energies, interlayer distance and the HOMO-LUMO gap of the optimized **PETA-PAM-COF** structures.

| <b>Stacking mode</b> | <b>c (Å)<br/>Interlayer distance</b> | <b>Total DFTB Energy (a.u.)</b> | <b>LJ energy (a.u.)</b> | <b>Per layer stabilization (kcal mol<sup>-1</sup>)</b> | <b>HOMO-LUMO gap (eV)</b> |
|----------------------|--------------------------------------|---------------------------------|-------------------------|--------------------------------------------------------|---------------------------|
| <b>Monolayer</b>     |                                      | -196.789961                     | 0.8600                  |                                                        | 1.304                     |
| <b>Slip AA</b>       | 3.66                                 | -393.866047                     | 1.4385                  | -89.77                                                 | 0.803                     |
| <b>AA</b>            | 3.83                                 | -393.821260                     | 1.4298                  | -75.72                                                 | 1.151                     |
| <b>AB</b>            | 3.13                                 | -393.7863914                    | 1.5347                  | -64.78                                                 | 1.220                     |

**Unit cell structure and parameters:**

|                                                                                             |
|---------------------------------------------------------------------------------------------|
| <b>PETA-PAM-COF</b>                                                                         |
| <b>Lattice type:</b> Triclinic                                                              |
| <b>Space Group:</b> P1                                                                      |
| <b>a=26.8849; b=27.9821; c=7.65738</b>                                                      |
| <b><math>\alpha=90.1737</math>; <math>\beta=89.7679</math>; <math>\gamma=89.7558</math></b> |

**Table S3.** Fractional atomic coordinates for the unit cell of the **PETA-PAM-COF**.

| <b>Number</b> | <b>Atomic Number</b> | <b>Label</b> | <b>X-axis</b> | <b>Y-axis</b> | <b>Z-axis</b> | <b>Element</b> |
|---------------|----------------------|--------------|---------------|---------------|---------------|----------------|
| 1             | 6                    | C1           | 0.57114       | 0.95467       | 0.02193       | C              |
| 2             | 6                    | C2           | 0.59122       | 0.90760       | 0.01806       | C              |
| 3             | 6                    | C3           | 0.64401       | 0.90077       | 0.01645       | C              |
| 4             | 6                    | C4           | 0.67572       | 0.94180       | 0.01828       | C              |
| 5             | 6                    | C5           | 0.65426       | 0.98738       | 0.02807       | C              |
| 6             | 6                    | C6           | 0.60196       | 0.99463       | 0.02968       | C              |
| 7             | 6                    | C7           | 0.66369       | 0.85307       | 0.01387       | C              |
| 8             | 6                    | C8           | 0.72990       | 0.93466       | 0.01298       | C              |
| 9             | 6                    | C9           | 0.74958       | 0.88699       | 0.01546       | C              |
| 10            | 6                    | C10          | 0.71791       | 0.84591       | 0.01792       | C              |
| 11            | 6                    | C11          | 0.80239       | 0.88030       | 0.01598       | C              |
| 12            | 6                    | C12          | 0.83448       | 0.92059       | 0.01629       | C              |
| 13            | 6                    | C13          | 0.81534       | 0.96697       | 0.01192       | C              |
| 14            | 6                    | C14          | 0.76288       | 0.97311       | 0.00709       | C              |

|    |   |     |         |         |          |   |
|----|---|-----|---------|---------|----------|---|
| 15 | 1 | H1  | 0.53042 | 0.95892 | 0.01748  | H |
| 16 | 1 | H2  | 0.87489 | 0.91432 | 0.02380  | H |
| 17 | 6 | C15 | 0.55907 | 0.86737 | 0.01847  | C |
| 18 | 6 | C16 | 0.57813 | 0.82094 | 0.01383  | C |
| 19 | 6 | C17 | 0.63061 | 0.81467 | 0.00888  | C |
| 20 | 1 | H3  | 0.51865 | 0.87371 | 0.02629  | H |
| 21 | 6 | C18 | 0.73949 | 0.80037 | 0.02641  | C |
| 22 | 6 | C19 | 0.82255 | 0.83330 | 0.01863  | C |
| 23 | 1 | H4  | 0.86328 | 0.82915 | 0.01295  | H |
| 24 | 6 | C20 | 0.79184 | 0.79326 | 0.02622  | C |
| 25 | 1 | H5  | 0.74811 | 1.00972 | -0.00206 | H |
| 26 | 1 | H6  | 0.71555 | 0.76868 | 0.03522  | H |
| 27 | 1 | H7  | 0.64532 | 0.77801 | 0.00020  | H |
| 28 | 1 | H8  | 0.67828 | 1.01901 | 0.03684  | H |
| 29 | 6 | C21 | 0.54498 | 0.77875 | 0.01845  | C |
| 30 | 6 | C22 | 0.49618 | 0.78066 | -0.04928 | C |
| 31 | 6 | C23 | 0.56123 | 0.73533 | 0.09316  | C |
| 32 | 6 | C24 | 0.46486 | 0.74118 | -0.04113 | C |
| 33 | 1 | H9  | 0.48251 | 0.81337 | -0.11291 | H |
| 34 | 6 | C25 | 0.53019 | 0.69563 | 0.09926  | C |
| 35 | 1 | H10 | 0.59845 | 0.73252 | 0.15184  | H |
| 36 | 6 | C26 | 0.48131 | 0.69788 | 0.03345  | C |
| 37 | 1 | H11 | 0.42707 | 0.74348 | -0.09535 | H |
| 38 | 1 | H12 | 0.54382 | 0.66241 | 0.15976  | H |
| 39 | 6 | C27 | 0.58018 | 0.04338 | 0.03755  | C |
| 40 | 6 | C28 | 0.53300 | 0.05070 | 0.11546  | C |

|    |   |     |         |         |          |   |
|----|---|-----|---------|---------|----------|---|
| 41 | 6 | C29 | 0.60451 | 0.08339 | -0.03489 | C |
| 42 | 6 | C30 | 0.51010 | 0.09531 | 0.11239  | C |
| 43 | 1 | H13 | 0.51378 | 0.02106 | 0.18110  | H |
| 44 | 6 | C31 | 0.58178 | 0.12835 | -0.03615 | C |
| 45 | 1 | H14 | 0.64117 | 0.07929 | -0.09800 | H |
| 46 | 6 | C32 | 0.53358 | 0.13480 | 0.03340  | C |
| 47 | 1 | H15 | 0.47300 | 0.10021 | 0.17133  | H |
| 48 | 1 | H16 | 0.60114 | 0.15855 | -0.09813 | H |
| 49 | 6 | C33 | 0.84829 | 1.00929 | 0.01747  | C |
| 50 | 6 | C34 | 0.89728 | 1.00758 | -0.05004 | C |
| 51 | 6 | C35 | 0.83165 | 1.05259 | 0.09342  | C |
| 52 | 6 | C36 | 0.92847 | 1.04711 | -0.03983 | C |
| 53 | 1 | H17 | 0.91122 | 0.97497 | -0.11486 | H |
| 54 | 6 | C37 | 0.86256 | 1.09236 | 0.10150  | C |
| 55 | 1 | H18 | 0.79421 | 1.05525 | 0.15161  | H |
| 56 | 6 | C38 | 0.91169 | 1.09024 | 0.03658  | C |
| 57 | 1 | H19 | 0.96644 | 1.04498 | -0.09367 | H |
| 58 | 1 | H20 | 0.84862 | 1.12548 | 0.16303  | H |
| 59 | 6 | C39 | 0.81411 | 0.74469 | 0.03065  | C |
| 60 | 6 | C40 | 0.86165 | 0.73774 | 0.10488  | C |
| 61 | 6 | C41 | 0.79018 | 0.70459 | -0.04291 | C |
| 62 | 6 | C42 | 0.88533 | 0.69354 | 0.09651  | C |
| 63 | 1 | H21 | 0.88056 | 0.76737 | 0.17183  | H |
| 64 | 6 | C43 | 0.81364 | 0.65999 | -0.04904 | C |
| 65 | 1 | H22 | 0.75321 | 0.70835 | -0.10293 | H |
| 66 | 6 | C44 | 0.86224 | 0.65403 | 0.01608  | C |

|    |   |     |          |         |          |   |
|----|---|-----|----------|---------|----------|---|
| 67 | 1 | H23 | 0.92269  | 0.68903 | 0.15262  | H |
| 68 | 1 | H24 | 0.79454  | 0.62972 | -0.11172 | H |
| 69 | 6 | C45 | 0.44889  | 0.65588 | 0.04370  | C |
| 70 | 1 | H25 | 0.46678  | 0.62181 | 0.09058  | H |
| 71 | 6 | C46 | 0.89066  | 0.60926 | -0.00557 | C |
| 72 | 1 | H26 | 0.87059  | 0.57671 | -0.05508 | H |
| 73 | 7 | N1  | 0.40240  | 0.65826 | 0.00539  | N |
| 74 | 7 | N2  | -0.06235 | 0.61000 | 0.02337  | N |
| 75 | 6 | C47 | 0.37198  | 0.61764 | 0.01024  | C |
| 76 | 6 | C48 | 0.38449  | 0.57565 | -0.08290 | C |
| 77 | 6 | C49 | 0.32655  | 0.61927 | 0.10273  | C |
| 78 | 6 | C50 | 0.35177  | 0.53711 | -0.08573 | C |
| 79 | 1 | H27 | 0.41857  | 0.57427 | -0.16302 | H |
| 80 | 6 | C51 | 0.29668  | 0.57874 | 0.11283  | C |
| 81 | 1 | H28 | 0.31668  | 0.65130 | 0.17915  | H |
| 82 | 6 | C52 | 0.30767  | 0.53678 | 0.01585  | C |
| 83 | 1 | H29 | 0.36057  | 0.50712 | -0.17377 | H |
| 84 | 1 | H30 | 0.26483  | 0.57966 | 0.20335  | H |
| 85 | 6 | C53 | 0.27464  | 0.49413 | 0.02025  | C |
| 86 | 6 | C54 | 0.29834  | 0.44854 | 0.03203  | C |
| 87 | 6 | C55 | 0.22220  | 0.50125 | 0.01379  | C |
| 88 | 6 | C56 | 0.35090  | 0.43953 | 0.03838  | C |
| 89 | 7 | N3  | 0.27584  | 0.40433 | 0.03174  | N |
| 90 | 7 | N4  | 0.18585  | 0.46695 | 0.02173  | N |
| 91 | 6 | C57 | 0.19886  | 0.54849 | 0.00785  | C |
| 92 | 6 | C58 | 0.35844  | 0.39091 | 0.03040  | C |

|     |   |     |         |         |          |   |
|-----|---|-----|---------|---------|----------|---|
| 93  | 1 | H31 | 0.38070 | 0.46584 | 0.04924  | H |
| 94  | 6 | C59 | 0.31077 | 0.36808 | 0.03232  | C |
| 95  | 1 | H32 | 0.23776 | 0.39908 | 0.02987  | H |
| 96  | 6 | C60 | 0.14077 | 0.49012 | 0.02609  | C |
| 97  | 6 | C61 | 0.14916 | 0.54178 | 0.02796  | C |
| 98  | 1 | H33 | 0.21645 | 0.58340 | -0.00936 | H |
| 99  | 1 | H34 | 0.39497 | 0.37372 | 0.02283  | H |
| 100 | 6 | C62 | 0.30173 | 0.31796 | 0.03945  | C |
| 101 | 6 | C63 | 0.09250 | 0.46912 | 0.02060  | C |
| 102 | 1 | H35 | 0.12206 | 0.57080 | 0.04450  | H |
| 103 | 6 | C64 | 0.25352 | 0.29694 | 0.04553  | C |
| 104 | 6 | C65 | 0.34552 | 0.28512 | 0.03532  | C |
| 105 | 6 | C66 | 0.08349 | 0.41894 | 0.02251  | C |
| 106 | 6 | C67 | 0.04897 | 0.50215 | 0.01097  | C |
| 107 | 6 | C68 | 0.24520 | 0.24531 | 0.05077  | C |
| 108 | 7 | N5  | 0.20843 | 0.32000 | 0.03651  | N |
| 109 | 6 | C69 | 0.34395 | 0.24286 | -0.06697 | C |
| 110 | 6 | C70 | 0.38928 | 0.29297 | 0.13333  | C |
| 111 | 7 | N6  | 0.11851 | 0.38280 | 0.02876  | N |
| 112 | 6 | C71 | 0.03589 | 0.39600 | 0.02655  | C |
| 113 | 6 | C72 | 0.00453 | 0.49571 | 0.10781  | C |
| 114 | 6 | C73 | 0.05171 | 0.54373 | -0.09403 | C |
| 115 | 6 | C74 | 0.19569 | 0.23837 | 0.02734  | C |
| 116 | 1 | H36 | 0.27231 | 0.21651 | 0.07091  | H |
| 117 | 6 | C75 | 0.17222 | 0.28559 | 0.02864  | C |
| 118 | 6 | C76 | 0.38117 | 0.20831 | -0.05782 | C |

|     |   |     |          |         |          |   |
|-----|---|-----|----------|---------|----------|---|
| 119 | 1 | H37 | 0.31295  | 0.23674 | -0.15729 | H |
| 120 | 6 | C77 | 0.42923  | 0.26081 | 0.12937  | C |
| 121 | 1 | H38 | 0.39193  | 0.32371 | 0.22271  | H |
| 122 | 6 | C78 | 0.09613  | 0.33861 | 0.03832  | C |
| 123 | 1 | H39 | 0.15657  | 0.38811 | 0.02439  | H |
| 124 | 6 | C79 | 0.04355  | 0.34764 | 0.04497  | C |
| 125 | 1 | H40 | -0.00071 | 0.41287 | 0.01601  | H |
| 126 | 6 | C80 | -0.03469 | 0.52860 | 0.10083  | C |
| 127 | 1 | H41 | 0.00076  | 0.46572 | 0.19940  | H |
| 128 | 6 | C81 | 0.01528  | 0.57913 | -0.08748 | C |
| 129 | 1 | H42 | 0.08323  | 0.54866 | -0.18389 | H |
| 130 | 1 | H43 | 0.17835  | 0.20332 | 0.01036  | H |
| 131 | 6 | C82 | 0.11974  | 0.29285 | 0.03202  | C |
| 132 | 6 | C83 | 0.42489  | 0.21711 | 0.03838  | C |
| 133 | 1 | H44 | 0.37800  | 0.17518 | -0.13448 | H |
| 134 | 1 | H45 | 0.46230  | 0.26783 | 0.20962  | H |
| 135 | 1 | H46 | 0.01384  | 0.32155 | 0.06386  | H |
| 136 | 6 | C84 | -0.02898 | 0.57184 | 0.00850  | C |
| 137 | 1 | H47 | -0.06823 | 0.52269 | 0.18072  | H |
| 138 | 1 | H48 | 0.01959  | 0.61172 | -0.16585 | H |
| 139 | 6 | C85 | 0.08649  | 0.25039 | 0.02822  | C |
| 140 | 6 | C86 | 0.09685  | 0.20837 | 0.12457  | C |
| 141 | 6 | C87 | 0.04260  | 0.25030 | -0.07342 | C |
| 142 | 6 | C88 | 0.06671  | 0.16804 | 0.11331  | C |
| 143 | 1 | H49 | 0.12834  | 0.20723 | 0.21566  | H |
| 144 | 6 | C89 | 0.00951  | 0.21208 | -0.07120 | C |

|     |   |      |          |          |          |   |
|-----|---|------|----------|----------|----------|---|
| 145 | 1 | H50  | 0.03429  | 0.28029  | -0.16120 | H |
| 146 | 6 | C90  | 0.02151  | 0.16997  | 0.02081  | C |
| 147 | 1 | H51  | 0.07615  | 0.13594  | 0.18900  | H |
| 148 | 1 | H52  | -0.02435 | 0.21370  | -0.15142 | H |
| 149 | 6 | C91  | 0.50546  | 0.17984  | 0.01566  | C |
| 150 | 1 | H53  | 0.52507  | 0.21184  | -0.04030 | H |
| 151 | 6 | C92  | 0.94414  | 1.13215  | 0.04975  | C |
| 152 | 1 | H54  | 0.92609  | 1.16628  | 0.09649  | H |
| 153 | 7 | N7   | 0.45896  | 0.17959  | 0.05375  | N |
| 154 | 7 | N8   | 0.99089  | 1.12954  | 0.01412  | N |
| 155 | 6 | C6   | 0.60196  | -0.00537 | 0.02968  | C |
| 156 | 6 | C27  | 0.58018  | 1.04338  | 0.03755  | C |
| 157 | 6 | C46  | -0.10934 | 0.60926  | -0.00557 | C |
| 158 | 7 | N2   | 0.93765  | 0.61000  | 0.02337  | N |
| 159 | 6 | C90  | 1.02151  | 1.16997  | 0.02081  | C |
| 160 | 7 | N8   | -0.00911 | 0.12954  | 0.01412  | N |
| 161 | 6 | C93  | 0.57114  | 0.95467  | 0.52193  | C |
| 162 | 6 | C94  | 0.59122  | 0.90760  | 0.51806  | C |
| 163 | 6 | C95  | 0.64401  | 0.90077  | 0.51645  | C |
| 164 | 6 | C96  | 0.67572  | 0.94180  | 0.51828  | C |
| 165 | 6 | C97  | 0.65426  | 0.98738  | 0.52807  | C |
| 166 | 6 | C98  | 0.60196  | 0.99463  | 0.52968  | C |
| 167 | 6 | C99  | 0.66369  | 0.85307  | 0.51387  | C |
| 168 | 6 | C100 | 0.72990  | 0.93466  | 0.51298  | C |
| 169 | 6 | C101 | 0.74958  | 0.88699  | 0.51546  | C |
| 170 | 6 | C102 | 0.71791  | 0.84591  | 0.51792  | C |



|     |   |      |         |         |         |   |
|-----|---|------|---------|---------|---------|---|
| 171 | 6 | C103 | 0.80239 | 0.88030 | 0.51598 | C |
| 172 | 6 | C104 | 0.83448 | 0.92059 | 0.51629 | C |
| 173 | 6 | C105 | 0.81534 | 0.96697 | 0.51192 | C |
| 174 | 6 | C106 | 0.76288 | 0.97311 | 0.50709 | C |
| 175 | 1 | H55  | 0.53042 | 0.95892 | 0.51748 | H |
| 176 | 1 | H56  | 0.87489 | 0.91432 | 0.52380 | H |
| 177 | 6 | C107 | 0.55907 | 0.86737 | 0.51847 | C |
| 178 | 6 | C108 | 0.57813 | 0.82094 | 0.51383 | C |
| 179 | 6 | C109 | 0.63061 | 0.81467 | 0.50888 | C |
| 180 | 1 | H57  | 0.51865 | 0.87371 | 0.52629 | H |
| 181 | 6 | C110 | 0.73949 | 0.80037 | 0.52641 | C |
| 182 | 6 | C111 | 0.82255 | 0.83330 | 0.51863 | C |
| 183 | 1 | H58  | 0.86328 | 0.82915 | 0.51295 | H |
| 184 | 6 | C112 | 0.79184 | 0.79326 | 0.52622 | C |
| 185 | 1 | H59  | 0.74811 | 1.00972 | 0.49794 | H |
| 186 | 1 | H60  | 0.71555 | 0.76868 | 0.53522 | H |
| 187 | 1 | H61  | 0.64532 | 0.77801 | 0.50020 | H |
| 188 | 1 | H62  | 0.67828 | 1.01901 | 0.53684 | H |
| 189 | 6 | C113 | 0.54498 | 0.77875 | 0.51845 | C |
| 190 | 6 | C114 | 0.49618 | 0.78066 | 0.45072 | C |
| 191 | 6 | C115 | 0.56123 | 0.73533 | 0.59316 | C |
| 192 | 6 | C116 | 0.46486 | 0.74118 | 0.45887 | C |
| 193 | 1 | H63  | 0.48251 | 0.81337 | 0.38709 | H |
| 194 | 6 | C117 | 0.53019 | 0.69563 | 0.59926 | C |
| 195 | 1 | H64  | 0.59845 | 0.73252 | 0.65184 | H |
| 196 | 6 | C118 | 0.48131 | 0.69788 | 0.53345 | C |

|     |   |      |         |         |         |   |
|-----|---|------|---------|---------|---------|---|
| 197 | 1 | H65  | 0.42707 | 0.74348 | 0.40465 | H |
| 198 | 1 | H66  | 0.54382 | 0.66241 | 0.65976 | H |
| 199 | 6 | C119 | 0.58018 | 0.04338 | 0.53755 | C |
| 200 | 6 | C120 | 0.53300 | 0.05070 | 0.61546 | C |
| 201 | 6 | C121 | 0.60451 | 0.08339 | 0.46511 | C |
| 202 | 6 | C122 | 0.51010 | 0.09531 | 0.61239 | C |
| 203 | 1 | H67  | 0.51378 | 0.02106 | 0.68110 | H |
| 204 | 6 | C123 | 0.58178 | 0.12835 | 0.46385 | C |
| 205 | 1 | H68  | 0.64117 | 0.07929 | 0.40200 | H |
| 206 | 6 | C124 | 0.53358 | 0.13480 | 0.53340 | C |
| 207 | 1 | H69  | 0.47300 | 0.10021 | 0.67133 | H |
| 208 | 1 | H70  | 0.60114 | 0.15855 | 0.40187 | H |
| 209 | 6 | C125 | 0.84829 | 1.00929 | 0.51747 | C |
| 210 | 6 | C126 | 0.89728 | 1.00758 | 0.44996 | C |
| 211 | 6 | C127 | 0.83165 | 1.05259 | 0.59342 | C |
| 212 | 6 | C128 | 0.92847 | 1.04711 | 0.46017 | C |
| 213 | 1 | H71  | 0.91122 | 0.97497 | 0.38514 | H |
| 214 | 6 | C129 | 0.86256 | 1.09236 | 0.60150 | C |
| 215 | 1 | H72  | 0.79421 | 1.05525 | 0.65161 | H |
| 216 | 6 | C130 | 0.91169 | 1.09024 | 0.53658 | C |
| 217 | 1 | H73  | 0.96644 | 1.04498 | 0.40633 | H |
| 218 | 1 | H74  | 0.84862 | 1.12548 | 0.66303 | H |
| 219 | 6 | C131 | 0.81411 | 0.74469 | 0.53065 | C |
| 220 | 6 | C132 | 0.86165 | 0.73774 | 0.60488 | C |
| 221 | 6 | C133 | 0.79018 | 0.70459 | 0.45709 | C |
| 222 | 6 | C134 | 0.88533 | 0.69354 | 0.59651 | C |

|     |   |      |         |         |         |   |
|-----|---|------|---------|---------|---------|---|
| 223 | 1 | H75  | 0.88056 | 0.76737 | 0.67183 | H |
| 224 | 6 | C135 | 0.81364 | 0.65999 | 0.45096 | C |
| 225 | 1 | H76  | 0.75321 | 0.70835 | 0.39707 | H |
| 226 | 6 | C136 | 0.86224 | 0.65403 | 0.51608 | C |
| 227 | 1 | H77  | 0.92269 | 0.68903 | 0.65262 | H |
| 228 | 1 | H78  | 0.79454 | 0.62972 | 0.38828 | H |
| 229 | 6 | C137 | 0.44889 | 0.65588 | 0.54370 | C |
| 230 | 1 | H79  | 0.46678 | 0.62181 | 0.59058 | H |
| 231 | 6 | C138 | 0.89066 | 0.60926 | 0.49443 | C |
| 232 | 1 | H80  | 0.87059 | 0.57671 | 0.44492 | H |
| 233 | 7 | N9   | 0.40240 | 0.65826 | 0.50539 | N |
| 234 | 7 | N10  | 0.93765 | 0.61000 | 0.52337 | N |
| 235 | 6 | C139 | 0.37198 | 0.61764 | 0.51024 | C |
| 236 | 6 | C140 | 0.38449 | 0.57565 | 0.41710 | C |
| 237 | 6 | C141 | 0.32655 | 0.61927 | 0.60273 | C |
| 238 | 6 | C142 | 0.35177 | 0.53711 | 0.41427 | C |
| 239 | 1 | H81  | 0.41857 | 0.57427 | 0.33698 | H |
| 240 | 6 | C143 | 0.29668 | 0.57874 | 0.61283 | C |
| 241 | 1 | H82  | 0.31668 | 0.65130 | 0.67915 | H |
| 242 | 6 | C144 | 0.30767 | 0.53678 | 0.51585 | C |
| 243 | 1 | H83  | 0.36057 | 0.50712 | 0.32623 | H |
| 244 | 1 | H84  | 0.26483 | 0.57966 | 0.70335 | H |
| 245 | 6 | C145 | 0.27464 | 0.49413 | 0.52025 | C |
| 246 | 6 | C146 | 0.29834 | 0.44854 | 0.53203 | C |
| 247 | 6 | C147 | 0.22220 | 0.50125 | 0.51379 | C |
| 248 | 6 | C148 | 0.35090 | 0.43953 | 0.53838 | C |

|     |   |      |         |         |         |   |
|-----|---|------|---------|---------|---------|---|
| 249 | 7 | N11  | 0.27584 | 0.40433 | 0.53174 | N |
| 250 | 7 | N12  | 0.18585 | 0.46695 | 0.52173 | N |
| 251 | 6 | C149 | 0.19886 | 0.54849 | 0.50785 | C |
| 252 | 6 | C150 | 0.35844 | 0.39091 | 0.53040 | C |
| 253 | 1 | H85  | 0.38070 | 0.46584 | 0.54924 | H |
| 254 | 6 | C151 | 0.31077 | 0.36808 | 0.53232 | C |
| 255 | 1 | H86  | 0.23776 | 0.39908 | 0.52987 | H |
| 256 | 6 | C152 | 0.14077 | 0.49012 | 0.52609 | C |
| 257 | 6 | C153 | 0.14916 | 0.54178 | 0.52796 | C |
| 258 | 1 | H87  | 0.21645 | 0.58340 | 0.49064 | H |
| 259 | 1 | H88  | 0.39497 | 0.37372 | 0.52283 | H |
| 260 | 6 | C154 | 0.30173 | 0.31796 | 0.53945 | C |
| 261 | 6 | C155 | 0.09250 | 0.46912 | 0.52060 | C |
| 262 | 1 | H89  | 0.12206 | 0.57080 | 0.54450 | H |
| 263 | 6 | C156 | 0.25352 | 0.29694 | 0.54553 | C |
| 264 | 6 | C157 | 0.34552 | 0.28512 | 0.53532 | C |
| 265 | 6 | C158 | 0.08349 | 0.41894 | 0.52251 | C |
| 266 | 6 | C159 | 0.04897 | 0.50215 | 0.51097 | C |
| 267 | 6 | C160 | 0.24520 | 0.24531 | 0.55077 | C |
| 268 | 7 | N13  | 0.20843 | 0.32000 | 0.53651 | N |
| 269 | 6 | C161 | 0.34395 | 0.24286 | 0.43303 | C |
| 270 | 6 | C162 | 0.38928 | 0.29297 | 0.63333 | C |
| 271 | 7 | N14  | 0.11851 | 0.38280 | 0.52876 | N |
| 272 | 6 | C163 | 0.03589 | 0.39600 | 0.52655 | C |
| 273 | 6 | C164 | 0.00453 | 0.49571 | 0.60781 | C |
| 274 | 6 | C165 | 0.05171 | 0.54373 | 0.40597 | C |

|     |   |      |          |         |         |   |
|-----|---|------|----------|---------|---------|---|
| 275 | 6 | C166 | 0.19569  | 0.23837 | 0.52734 | C |
| 276 | 1 | H90  | 0.27231  | 0.21651 | 0.57091 | H |
| 277 | 6 | C167 | 0.17222  | 0.28559 | 0.52864 | C |
| 278 | 6 | C168 | 0.38117  | 0.20831 | 0.44218 | C |
| 279 | 1 | H91  | 0.31295  | 0.23674 | 0.34271 | H |
| 280 | 6 | C169 | 0.42923  | 0.26081 | 0.62937 | C |
| 281 | 1 | H92  | 0.39193  | 0.32371 | 0.72271 | H |
| 282 | 6 | C170 | 0.09613  | 0.33861 | 0.53832 | C |
| 283 | 1 | H93  | 0.15657  | 0.38811 | 0.52439 | H |
| 284 | 6 | C171 | 0.04355  | 0.34764 | 0.54497 | C |
| 285 | 1 | H94  | -0.00071 | 0.41287 | 0.51601 | H |
| 286 | 6 | C172 | 0.96531  | 0.52860 | 0.60083 | C |
| 287 | 1 | H95  | 0.00076  | 0.46572 | 0.69940 | H |
| 288 | 6 | C173 | 0.01528  | 0.57913 | 0.41252 | C |
| 289 | 1 | H96  | 0.08323  | 0.54866 | 0.31611 | H |
| 290 | 1 | H97  | 0.17835  | 0.20332 | 0.51036 | H |
| 291 | 6 | C174 | 0.11974  | 0.29285 | 0.53202 | C |
| 292 | 6 | C175 | 0.42489  | 0.21711 | 0.53838 | C |
| 293 | 1 | H98  | 0.37800  | 0.17518 | 0.36552 | H |
| 294 | 1 | H99  | 0.46230  | 0.26783 | 0.70962 | H |
| 295 | 1 | H100 | 0.01384  | 0.32155 | 0.56386 | H |
| 296 | 6 | C176 | 0.97102  | 0.57184 | 0.50850 | C |
| 297 | 1 | H101 | 0.93177  | 0.52269 | 0.68072 | H |
| 298 | 1 | H102 | 0.01959  | 0.61172 | 0.33415 | H |
| 299 | 6 | C177 | 0.08649  | 0.25039 | 0.52822 | C |
| 300 | 6 | C178 | 0.09685  | 0.20837 | 0.62457 | C |

|     |   |      |          |          |         |   |
|-----|---|------|----------|----------|---------|---|
| 301 | 6 | C179 | 0.04260  | 0.25030  | 0.42658 | C |
| 302 | 6 | C180 | 0.06671  | 0.16804  | 0.61331 | C |
| 303 | 1 | H103 | 0.12834  | 0.20723  | 0.71566 | H |
| 304 | 6 | C181 | 0.00951  | 0.21208  | 0.42880 | C |
| 305 | 1 | H104 | 0.03429  | 0.28029  | 0.33880 | H |
| 306 | 6 | C182 | 0.02151  | 0.16997  | 0.52081 | C |
| 307 | 1 | H105 | 0.07615  | 0.13594  | 0.68900 | H |
| 308 | 1 | H106 | -0.02435 | 0.21370  | 0.34858 | H |
| 309 | 6 | C183 | 0.50546  | 0.17984  | 0.51566 | C |
| 310 | 1 | H107 | 0.52507  | 0.21184  | 0.45970 | H |
| 311 | 6 | C184 | 0.94414  | 1.13215  | 0.54975 | C |
| 312 | 1 | H108 | 0.92609  | 1.16628  | 0.59649 | H |
| 313 | 7 | N15  | 0.45896  | 0.17959  | 0.55375 | N |
| 314 | 7 | N16  | 0.99089  | 1.12954  | 0.51412 | N |
| 315 | 6 | C98  | 0.60196  | -0.00537 | 0.52968 | C |
| 316 | 6 | C119 | 0.58018  | 1.04338  | 0.53755 | C |
| 317 | 6 | C164 | 1.00453  | 0.49571  | 0.60781 | C |
| 318 | 6 | C172 | -0.03469 | 0.52860  | 0.60083 | C |
| 319 | 6 | C173 | 1.01528  | 0.57913  | 0.41252 | C |
| 320 | 6 | C176 | -0.02898 | 0.57184  | 0.50850 | C |
| 321 | 6 | C182 | 1.02151  | 1.16997  | 0.52081 | C |
| 322 | 7 | N16  | -0.00911 | 0.12954  | 0.51412 | N |

### Section S6

#### References:

- 1 B. E. Conway, and G. Jerkiewicz, , *Electrochimica Acta Materialia* 2000, **45**, 4075-4083.
- 2 K. Kunimatsu, T. Senzaki, M. Tsushima, and M. Osawa, *Chem. Phys. Lett.* 2005, **401**, 451-454.
- 3 E. Lason, G.S. Karlberg, J. Rossmeisl, T. Bligaard, J. Greeley, H. Jonsson and J. K. Nørskov, *Phys. Chem. Chem. Phys.* 2007, **9**, 3241-3250.
- 4 Y. Zheng, Y. Jiao, Y. Zhu, L. H. Li, Y. Han, Y. Chen, A. Du, M. Jaroniec and S. Z. Qiao, *Nat. Commun.* 2014, **5**, 3783.
- 5 H. Jia, Y. Yao, Y. Gao, D. Lu and P. Du, *Chem. Commun.* 2016, **52**, 13483-13486.
- 6 M. Jahan, Z. Liu and K. P. Loh, *Adv. Funct. Mater.* 2013, **23**, 5363-5372.
- 7 Y. Zheng, Y. Jiao, L. H. Li, T. Xing, Y. Chen, M. Jaroniec and S. Z. Qiao, *ACS. Nano* 2014, **8**, 5290-5296.
- 8 Y. Ito, W. Cong, T. Fujita, Z. Tang and M. Chen, *Angew. Chem. Int. Ed.* 2015, **54**, 2131-2136.
- 9 M. Shalom, S. Gimenez, F. Schipper, I.H. Cardona, J. Bisquert and M. Antonietti, *Angew. Chem. Int. Ed.* 2014, **53**, 3654-3658.
- 10 W. Cui, Q. Liu, N. Cheng, A.M. Asiri, X. Sun, *Chem. Commun.* 2014, **50**, 9340-9342.
- 11 Y. Zhao, F. Zhao, X. Wang, C. Xu, Z. Zhang, G. Shi and L. Qu, *Angew. Chem. Int. Ed.* 2014, **53**, 13934-13939.
- 12 R. Dong, M. Pfeiffermann, H. Liang, Z. Zheng, X. Zhu, J. Zhang and X. Feng, Large-Area, Free-Standing, *Angew. Chem. Int. Ed.* 2015, **54**, 12058-12063.
- 13 S. Cui, M. Qian, X. Liu, Z. Sun and P. Du, *ChemSusChem.* 2016, **9**, 2365-2373.
- 14 B.C. Patra, S. Khilari, R.N. Manna, S. Mondal, D. Pradhan, A. Pradhan and A. Bhaumik, *ACS Catal.* 2017, **7**, 9, 6120–6127.
- 15 S. Maiti, R.A. Chowdhury and K. A. Das, *ChemNanoMat*, 2019, **6**, 99-106.
- 16 S. Bhunia, S. K. Das, R. Jana, S. C. Peter, S. Bhattacharya, M. Addicoat, A. Bhaumik, and A. Pradhan, *ACS Appl. Mater. Interfaces*, 2017, **9**, 23843–23851.
- 17 L. Su, X. Cui, T. He, L. Zeng, H. Tian, Y. Song, K. Qi, and B. Y. Xia, *Chem. Sci.* 2019, **10**, 2019-2024.
- 18 H. B. Wu, B. Y. Xia, L. Yu, X.-Y. Yu, and X. W. Lou, *Nat. Comm.* 2016, **6**, 6512.
- 19 J.-S. Li, Y. Wang, C.-H. Liu, S.L. Li, Y.G. Wang, L. Z. Dong, Z. -H. Dai, Y.-F. Li, and Y. -Q. Lan, *Nat. Comm.* 2016, **6**, 6512.
- 20 I. Hod, P. Deria, W. Bury, J. E. Mondloch, C.-W. Kung, M. So, M. D. Sampson, A. W. Peters, C. P. Kubiak, O. K. Farha, and J. T. Hupp, *Nat. Comm.* 2015, **6**, 8304.
- 21 K. He, Z. Cao, R. Liu, Y. Miao, H. Ma, and Y. Ding, *Nano Research* 2016, **9**, 1856-1865.
- 22 D. Wu, Q. Xu, J. Qian, X. Li, and Y. Sun, *Chem. Eur. J.* 2019, **25**, 3105-3111.
- 23 S. Cui, M. Qian, X. Liu, Z. Sun, and P. Du, *Chem Sus Chem.* 2016, **9**, 2365-2373.
- 24 A. Pradhan, and N.R. Manna, *ACS Appl. Polym. Mater.* 2021, **3**, 1376–1384.
- 25 J.-S. Qin, D.-Y. Du, W. Guan, X.-J. Bo, Y.-F. Li, L.-P. Guo, Z.-M. Su, Y.-Y. Wang, Y.-Q. Lan, and H.-C. Zhou, *J. Am. Chem. Soc.* 2015, **137**, 7169-7177.
